# Supplementary material for: Outcomes Following Macrolide Use in Kidney Transplant Recipients
Source: PubMed Central journal article supplement — Can J Kidney Health Dis. 2019 Feb 21;6:2054358119830706. doi: 10.1177/2054358119830706 (PMC6385328; doi:10.1177/2054358119830706), 2019-02-21
Supplement: RTx_Macrolides_-_Appendix_-_20181231.pdf [file RTx_Macrolides_-_Appendix_-_20181231.pdf]

## **Supplementary Materials**

**Figure S1.** Cohort creation. Abbreviation: CNI; calcineurin inhibitor.

**Figures S2.** Study design. Abbreviation: CNI; calcineurin inhibitor.

**Table S1.** STROBE checklist.

**Table S2.** Databases and coding definitions for inclusion/exclusion criteria, baseline characteristics, and outcome measurements.

Figure S1.

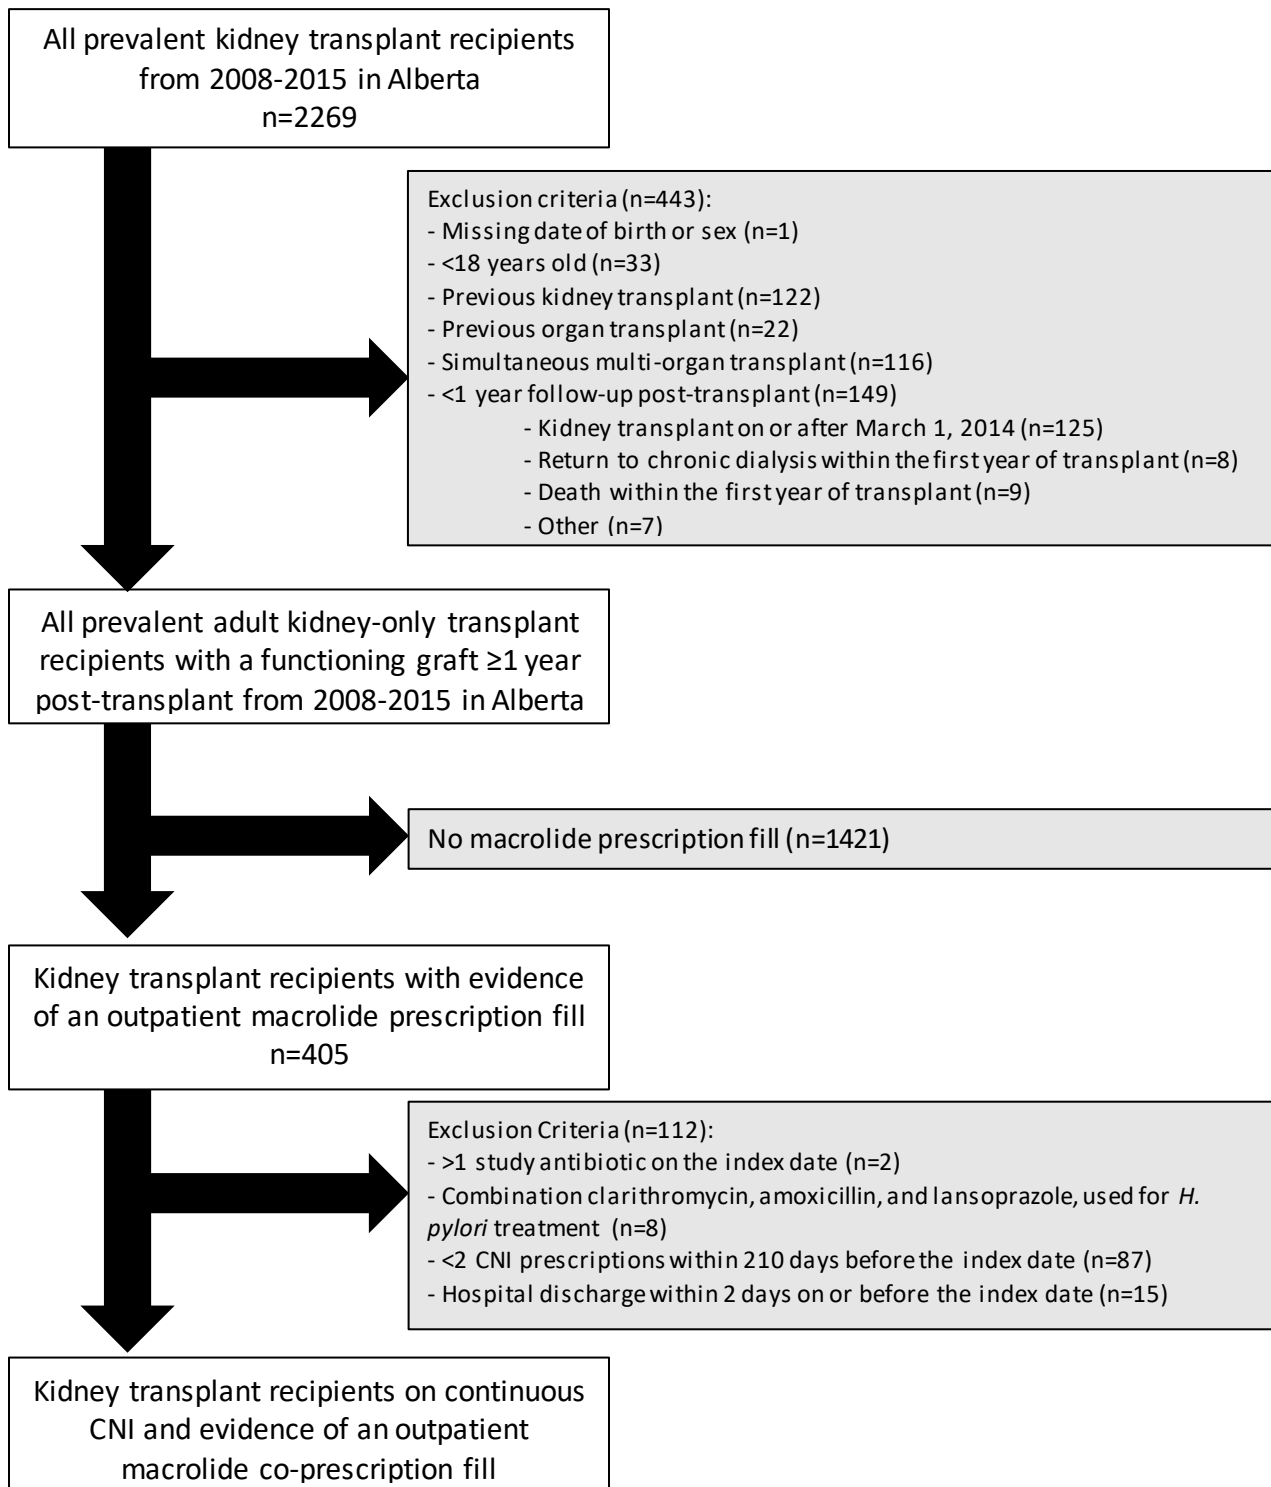

Figure S2.

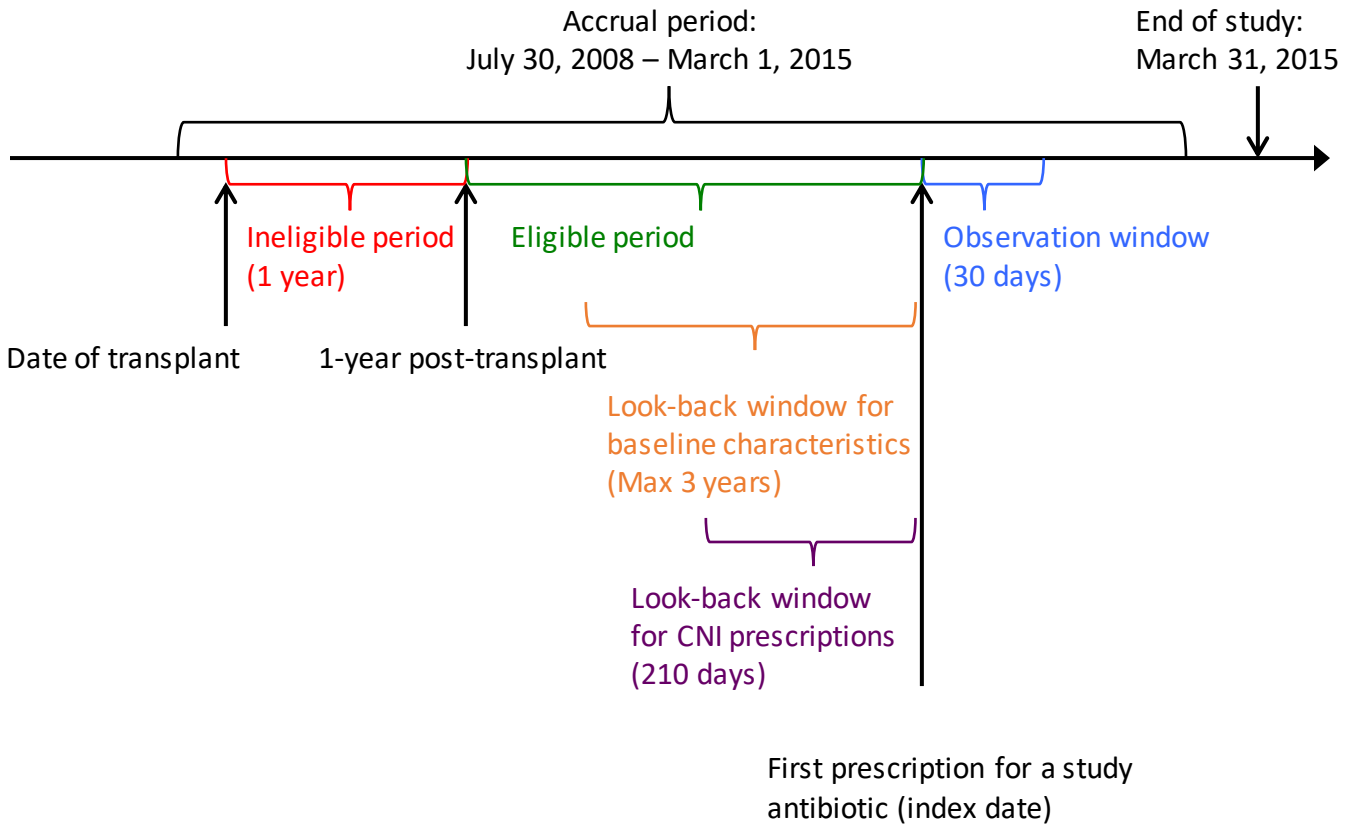

| <b>Table S1. STROBE checklist.<sup>32</sup></b> |             |                                                                                                                                                                                      |                |
|-------------------------------------------------|-------------|--------------------------------------------------------------------------------------------------------------------------------------------------------------------------------------|----------------|
|                                                 | <b>Item</b> | <b>Recommendation</b>                                                                                                                                                                | <b>Section</b> |
| Title and abstract                              | 1           | (a) Indicate the study's design with a commonly used term in the title or the abstract                                                                                               | Abstract       |
|                                                 |             | (b) Provide in the abstract an informative and balanced summary of what was done and what was found                                                                                  | Abstract       |
| <b>Introduction</b>                             |             |                                                                                                                                                                                      |                |
| Background/rationale                            | 2           | Explain the scientific background and rationale for the investigation being reported                                                                                                 | Introduction   |
| Objectives                                      | 3           | State specific objectives, including any prespecified hypotheses                                                                                                                     | Introduction   |
| <b>Methods</b>                                  |             |                                                                                                                                                                                      |                |
| Study design                                    | 4           | Present key elements of study design early in the paper                                                                                                                              | Methods        |
| Setting                                         | 5           | Describe the setting, locations, and relevant dates, including periods of recruitment, exposure, follow-up, and data collection                                                      | Methods        |
| Participants                                    | 6           | (a) Give the eligibility criteria, and the sources and methods of selection of participants. Describe methods of follow-up                                                           | Methods        |
|                                                 |             | (b) For matched studies, give matching criteria and number of exposed and unexposed                                                                                                  | Not applicable |
| Variables                                       | 7           | Clearly define all outcomes, exposures, predictors, potential confounders, and effect modifiers. Give diagnostic criteria, if applicable                                             | Methods        |
| Data sources/<br>measurement                    | 8           | For each variable of interest, give sources of data and details of methods of assessment (measurement). Describe comparability of assessment methods if there is more than one group | Methods        |
| Bias                                            | 9           | Describe any efforts to address potential sources of bias                                                                                                                            | Methods        |
| Study size                                      | 10          | Explain how the study size was arrived at                                                                                                                                            | Figure S1      |
| Quantitative variables                          | 11          | Explain how quantitative variables were handled in the analyses. If applicable, describe which groupings were chosen and why                                                         | Methods        |
| Statistical methods                             | 12          | (a) Describe all statistical methods, including those used to control for confounding                                                                                                | Methods        |
|                                                 |             | (b) Describe any methods used to examine subgroups and interactions                                                                                                                  | Methods        |
|                                                 |             | (c) Explain how missing data were addressed                                                                                                                                          | Methods        |
|                                                 |             | (d) If applicable, explain how loss to follow-up was addressed                                                                                                                       | Methods        |
|                                                 |             | (e) Describe any sensitivity analyses                                                                                                                                                | Methods        |

| <b>Table S1. STROBE checklist (continued).</b> |             |                                                                                                                                                                                                               |                                     |
|------------------------------------------------|-------------|---------------------------------------------------------------------------------------------------------------------------------------------------------------------------------------------------------------|-------------------------------------|
|                                                | <b>Item</b> | <b>Recommendation</b>                                                                                                                                                                                         | <b>Section</b>                      |
| <b>Results</b>                                 |             |                                                                                                                                                                                                               |                                     |
| Participants                                   | 13          | (a) Report numbers of individuals at each stage of study—e.g. numbers potentially eligible, examined for eligibility, confirmed eligible, included in the study, completing follow-up, and analysed           | Methods                             |
|                                                |             | (b) Give reasons for non-participation at each stage                                                                                                                                                          | Methods                             |
|                                                |             | (c) Consider use of a flow diagram                                                                                                                                                                            | Figure S1                           |
| Descriptive data                               | 14          | (a) Give characteristics of study participants (e.g. demographic, clinical, social) and information on exposures and potential confounders                                                                    | Results<br>Table 1                  |
|                                                |             | (b) Indicate number of participants with missing data for each variable of interest                                                                                                                           | Table 1                             |
|                                                |             | (c) Summarise follow-up time (e.g. average and total amount)                                                                                                                                                  | Results                             |
| Outcome data                                   | 15          | Report numbers of outcome events or summary measures over time                                                                                                                                                | Results                             |
| Main results                                   | 16          | (a) Give unadjusted estimates and, if applicable, confounder-adjusted estimates and their precision (e.g. 95% confidence interval). Make clear which confounders were adjusted for and why they were included | Results                             |
|                                                |             | (b) Report category boundaries when continuous variables were categorized                                                                                                                                     | Results                             |
|                                                |             | (c) If relevant, consider translating estimates of relative risk into absolute risk for a meaningful time period                                                                                              | Not applicable                      |
| Other analyses                                 | 17          | Report other analyses done—e.g. analyses of subgroups and interactions, and sensitivity analyses                                                                                                              | Not applicable                      |
| <b>Discussion</b>                              |             |                                                                                                                                                                                                               |                                     |
| Key results                                    | 18          | Summarise key results with reference to study objectives                                                                                                                                                      | Discussion                          |
| Limitations                                    | 19          | Discuss limitations of the study, taking into account sources of potential bias or imprecision. Discuss both direction and magnitude of any potential bias                                                    | Discussion                          |
| Interpretation                                 | 20          | Give a cautious overall interpretation of results considering objectives, limitations, multiplicity of analyses, results from similar studies, and other relevant evidence                                    | Discussion                          |
| Generalisability                               | 21          | Discuss the generalisability (external validity) of the study results                                                                                                                                         | Discussion                          |
| <b>Other information</b>                       |             |                                                                                                                                                                                                               |                                     |
| Funding                                        | 22          | Give the source of funding and the role of the funders for the present study and, if applicable, for the original study on which the present article is based                                                 | Acknowledgements<br>and Disclosures |

| Table S2. Databases and coding definitions for inclusion/exclusion criteria, baseline characteristics, and outcome measurements. |                    |                                                                                                          |                                                                   |  |
|----------------------------------------------------------------------------------------------------------------------------------|--------------------|----------------------------------------------------------------------------------------------------------|-------------------------------------------------------------------|--|
| Variable                                                                                                                         | Database           | Codes                                                                                                    |                                                                   |  |
| <b>Inclusion Criteria</b>                                                                                                        |                    |                                                                                                          |                                                                   |  |
| Kidney transplantation                                                                                                           | NARP, SARP         | Variables: Modality = Transplant; Incident = 1; Numinctrans = 1<br>Transdate1 = Date of first transplant |                                                                   |  |
| <b>Exclusion Criteria</b>                                                                                                        |                    |                                                                                                          |                                                                   |  |
| Age                                                                                                                              | AH                 | Population Registry                                                                                      |                                                                   |  |
| Kidney transplantation                                                                                                           | NARP, SARP         | As above                                                                                                 |                                                                   |  |
|                                                                                                                                  | AH<br>(since 1994) | CCI code: 1PC85                                                                                          |                                                                   |  |
|                                                                                                                                  |                    | ICD-9-CM: 5569                                                                                           |                                                                   |  |
|                                                                                                                                  |                    | CCP codes: 67.4, 67.59, 67.5                                                                             |                                                                   |  |
| Other organ transplant                                                                                                           | AH                 | Pancreas transplant                                                                                      | CCI: 1OJ85                                                        |  |
|                                                                                                                                  |                    |                                                                                                          | ICD-9-CM: 528 (includes 5280, 5281, 5282, 5283, 5284, 5285, 5286) |  |
|                                                                                                                                  |                    |                                                                                                          | CCP: 64.8                                                         |  |
|                                                                                                                                  |                    | Liver transplant                                                                                         | CCI: 1OA85                                                        |  |
|                                                                                                                                  |                    |                                                                                                          | ICD-9-CM: 505 (includes 5051, 5059)                               |  |
|                                                                                                                                  |                    |                                                                                                          | CCP: 62.49, 62.4                                                  |  |
|                                                                                                                                  |                    | Bowel transplant                                                                                         | CCI: 1NK85, 1NP85                                                 |  |
|                                                                                                                                  |                    |                                                                                                          | ICD-9-CM: 4697                                                    |  |
|                                                                                                                                  |                    |                                                                                                          | CCP: 58.99                                                        |  |
|                                                                                                                                  |                    | Multi-visceral transplant                                                                                | CCI: 1HY85, 1OK85                                                 |  |
|                                                                                                                                  |                    |                                                                                                          | ICD-9-CM: 336                                                     |  |
|                                                                                                                                  |                    |                                                                                                          | CCP: 45.6                                                         |  |
|                                                                                                                                  |                    | Lung transplant                                                                                          | CCI: 1GR85, 1GT85                                                 |  |
|                                                                                                                                  |                    |                                                                                                          | ICD-9-CM: 335 (includes 3350, 3351, 3352)                         |  |
|                                                                                                                                  |                    |                                                                                                          | CCP: 45.5                                                         |  |
|                                                                                                                                  |                    | Heart transplant                                                                                         | CCI: 1HZ85                                                        |  |
|                                                                                                                                  |                    |                                                                                                          | ICD-9-CM: 3751                                                    |  |
|                                                                                                                                  |                    |                                                                                                          | CCP: 49.5                                                         |  |
| Graft failure (dialysis, transplant)                                                                                             | NARP, SARP         |                                                                                                          |                                                                   |  |
| Mortality                                                                                                                        | AH                 | Alberta Vital Statistics                                                                                 |                                                                   |  |
| CNI/Antibiotic prescription                                                                                                      | PIN                |                                                                                                          |                                                                   |  |
| Hospital admission                                                                                                               | AH                 |                                                                                                          |                                                                   |  |

**Table S2. Databases and coding definitions for inclusion/exclusion criteria, baseline characteristics, and outcome measurements (continued).**

| Baseline Characteristics                         | Database        | Codes                                                                                                                                                                                                                                                                                                                                                                 |                                                                    |
|--------------------------------------------------|-----------------|-----------------------------------------------------------------------------------------------------------------------------------------------------------------------------------------------------------------------------------------------------------------------------------------------------------------------------------------------------------------------|--------------------------------------------------------------------|
| <b>Demographics</b>                              |                 |                                                                                                                                                                                                                                                                                                                                                                       |                                                                    |
| Age, Sex, SES, Residence                         | AH              | Population Registry                                                                                                                                                                                                                                                                                                                                                   |                                                                    |
| <b>Kidney-related Characteristics</b>            |                 |                                                                                                                                                                                                                                                                                                                                                                       |                                                                    |
| Dialysis modality                                | NARP, SARP      | Variable: Modality = Hemodialysis, Peritoneal dialysis, Pre-care (Pre-emptive)                                                                                                                                                                                                                                                                                        |                                                                    |
|                                                  | AH              | Hemodialysis: ≥2 outpatient claims 90 days apart<br>CCP: 13.99A, 13.99B, 13.99O, 13.99OA<br>1 hospitalization or claim:<br>CCP: 51.95 (must be outpatient)<br>CCI: 1PZ21HQBR, 1PZ21HQBS<br><br>Peritoneal dialysis: ≥2 outpatient claims 90 days apart<br>CCP: 13.99C, 13.99D, 13.99OA<br>1 hospitalization or claim:<br>66.98 (must be outpatient)<br>CCI: 1PZ21HPD4 |                                                                    |
| Dialysis/Transplant duration                     | NARP, SARP      | Variable: Duration                                                                                                                                                                                                                                                                                                                                                    |                                                                    |
| Site of transplantation                          | NARP, SARP      | Variable: Program                                                                                                                                                                                                                                                                                                                                                     |                                                                    |
| Laboratory data                                  | AKDN            |                                                                                                                                                                                                                                                                                                                                                                       |                                                                    |
| <b>Co-morbidities</b>                            | <b>Database</b> | <b>Codes</b>                                                                                                                                                                                                                                                                                                                                                          | <b>Validation</b>                                                  |
| Hypertension <sup>47</sup>                       | AH              | 1 hospitalization or 2 claims in 2 years or less:<br>ICD-9-CM: 401-405<br>ICD-10: I10-I13, I15                                                                                                                                                                                                                                                                        | ICD-9-CM: Sn 79%, PPV 95%<br>ICD-10: Sn 68%, PPV 93% <sup>56</sup> |
| Diabetes mellitus <sup>46</sup>                  | AH              | 1 hospitalization or 2 claims in 2 years or less:<br>ICD-9-CM: 250<br>ICD-10: E10-E14                                                                                                                                                                                                                                                                                 | ICD-9-CM: Sn 86%, PPV 80%                                          |
| Myocardial infarction <sup>57</sup>              | AH              | 1 hospitalization:<br>ICD-9-CM: 410<br>ICD-10: I21, I22                                                                                                                                                                                                                                                                                                               | ICD-9-CM: Sn 89%, PPV 89%                                          |
| Percutaneous coronary intervention <sup>58</sup> | AH              | CCI: 1IJ50, 1IJ54GQ-AZ, 1IJ57GQ<br>CCP: 51.59C, 51.59D, 51.59E, 51.59F                                                                                                                                                                                                                                                                                                | CCI: PPV 94-96%                                                    |
| Coronary artery bypass graft <sup>58</sup>       | AH              | CCI: 1IJ76<br>CCP: 48.11, 48.12, 48.13, 48.14, 48.15, 48.19                                                                                                                                                                                                                                                                                                           | CCI: PPV 97-98%                                                    |
| Chronic heart failure <sup>44,56</sup>           | AH              | 1 hospitalization or 2 claims in 2 years or less:<br>ICD-9-CM: 398.91, 402.01, 402.11, 402.91, 404.01, 404.03, 404.11, 404.13, 404.91, 404.93, 425.4-425.9, 428<br>ICD-10: I09.9, I25.5, I42.0, I42.5-I42.9, I43, I50                                                                                                                                                 | ICD-9-CM: Sn 72%, PPV 91%<br>ICD-10: Sn 69%, PPV 90%               |
| Atrial fibrillation <sup>59</sup>                | AH              | 1 hospitalization or 2 claims in 2 years or less:<br>ICD-9 CM: 427.3<br>ICD-10: I48.0                                                                                                                                                                                                                                                                                 | ICD-9-CM: Sn 84%, PPV 89%                                          |

**Table S2. Databases and coding definitions for inclusion/exclusion criteria, baseline characteristics, and outcome measurements (continued).**

| Co-morbidities                                       | Database | Codes                                                                                                                                                                                                                                                                                                                                                                                                                                                                                                                                                        | Validation                                           |
|------------------------------------------------------|----------|--------------------------------------------------------------------------------------------------------------------------------------------------------------------------------------------------------------------------------------------------------------------------------------------------------------------------------------------------------------------------------------------------------------------------------------------------------------------------------------------------------------------------------------------------------------|------------------------------------------------------|
| Stroke/Transient ischemic attack <sup>60</sup>       | AH       | 1 most responsible or post-admittance hospitalization or 1 claim or 1 most responsible emergency department ACCS:<br>ICD-9-CM: 362.3, 430, 431, 433.x1, 434.x1, 435, 436<br>ICD-10: G45.0-G45.3, G45.8-G45.9, H34.1, I60, I61, I63, I64                                                                                                                                                                                                                                                                                                                      | ICD-9-CM: PPV 90%<br>ICD-10: PPV 92%                 |
| Peripheral vascular disease <sup>61</sup>            | AH       | 1 hospitalization or 1 claim or 1 ACCS:<br>ICD-9-CM: 440.2<br>ICD-10: I70.2                                                                                                                                                                                                                                                                                                                                                                                                                                                                                  | ICD-9-CM: Sn 77%, PPV 94%                            |
| Cancer, lymphoma <sup>56</sup>                       | AH       | 1 hospitalization or 2 claims in 2 years or less:<br>ICD-9-CM: 200-202, 203.0, 238.6<br>ICD-10: C81-C85, C88, C90.0, C90.2, C96                                                                                                                                                                                                                                                                                                                                                                                                                              | ICD-9-CM: Sn 66%, PPV 73%<br>ICD-10: Sn 63%, PPV 79% |
| Cancer, solid tumor without metastasis <sup>56</sup> | AH       | 1 hospitalization or 2 claims in 2 years or less:<br>ICD-9-CM: 140-172, 174-195<br>ICD-10: C00-C26, C30-C34, C37-C41, C43, C45-C58, C60-C76, C97                                                                                                                                                                                                                                                                                                                                                                                                             | ICD-9-CM: Sn 44%, PPV 57%<br>ICD-10: Sn 46%, PPV 59% |
| Cancer, metastatic <sup>56</sup>                     | AH       | 1 hospitalization or 2 claims in 2 years or less:<br>ICD-9-CM: 196-199<br>ICD-10: C77-C80                                                                                                                                                                                                                                                                                                                                                                                                                                                                    | ICD-9-CM: Sn 83%, PPV 89%<br>ICD-10: Sn 81%, PPV 87% |
| Charlson co-morbidity index <sup>44,62</sup>         | AH       | Charlson Index Score = Sum of the weights for the comorbid conditions that are present<br>Weights of 1: cerebrovascular disease, congestive heart failure, chronic pulmonary disease, dementia, diabetes without chronic complications, myocardial infarction, mild liver disease, peptic ulcer disease, peripheral vascular disease, rheumatic disease<br>Weights of 2: cancer, diabetes with chronic complications, paraplegia/hemiplegia, renal disease<br>Weights of 3: moderate/severe liver disease<br>Weights of 6: HIV/AIDS, metastatic solid tumour |                                                      |



**Table S2. Databases and coding definitions for inclusion/exclusion criteria, baseline characteristics, and outcome measurements (continued).**

| <b>Drug-related Characteristics</b>                                                                                                                                                                                                                                                                                                                                                                                                                                                                                                                                                                                                                                                                                       | <b>Database</b>                      | <b>Codes</b>                                                                                                                                                                                                                                                                                                                                                                                                                                                                                                                                                                                                                                                                                                                                                                                                                                                                                                                                                                                                                                                                                                                                                                                                                                                                                                                                                                                                                                                                                                                                                                                                                                                                                                                                                                                                                                                                                           |                                      |                |      |                  |      |            |      |            |      |                   |      |           |      |                                |      |              |      |                        |      |                            |      |                             |      |                  |      |                     |      |               |      |             |      |                     |     |                          |      |                |      |                                |      |                                      |      |                          |      |                 |      |                  |      |                        |      |                    |      |              |      |                                      |      |                      |      |                 |      |                                      |    |                  |      |                  |     |            |      |         |      |                     |      |                  |      |                   |  |  |
|---------------------------------------------------------------------------------------------------------------------------------------------------------------------------------------------------------------------------------------------------------------------------------------------------------------------------------------------------------------------------------------------------------------------------------------------------------------------------------------------------------------------------------------------------------------------------------------------------------------------------------------------------------------------------------------------------------------------------|--------------------------------------|--------------------------------------------------------------------------------------------------------------------------------------------------------------------------------------------------------------------------------------------------------------------------------------------------------------------------------------------------------------------------------------------------------------------------------------------------------------------------------------------------------------------------------------------------------------------------------------------------------------------------------------------------------------------------------------------------------------------------------------------------------------------------------------------------------------------------------------------------------------------------------------------------------------------------------------------------------------------------------------------------------------------------------------------------------------------------------------------------------------------------------------------------------------------------------------------------------------------------------------------------------------------------------------------------------------------------------------------------------------------------------------------------------------------------------------------------------------------------------------------------------------------------------------------------------------------------------------------------------------------------------------------------------------------------------------------------------------------------------------------------------------------------------------------------------------------------------------------------------------------------------------------------------|--------------------------------------|----------------|------|------------------|------|------------|------|------------|------|-------------------|------|-----------|------|--------------------------------|------|--------------|------|------------------------|------|----------------------------|------|-----------------------------|------|------------------|------|---------------------|------|---------------|------|-------------|------|---------------------|-----|--------------------------|------|----------------|------|--------------------------------|------|--------------------------------------|------|--------------------------|------|-----------------|------|------------------|------|------------------------|------|--------------------|------|--------------|------|--------------------------------------|------|----------------------|------|-----------------|------|--------------------------------------|----|------------------|------|------------------|-----|------------|------|---------|------|---------------------|------|------------------|------|-------------------|--|--|
| Prescriptions                                                                                                                                                                                                                                                                                                                                                                                                                                                                                                                                                                                                                                                                                                             | PIN                                  | Immunosuppression, Antibiotic, Cardiac medications, NSAIDs                                                                                                                                                                                                                                                                                                                                                                                                                                                                                                                                                                                                                                                                                                                                                                                                                                                                                                                                                                                                                                                                                                                                                                                                                                                                                                                                                                                                                                                                                                                                                                                                                                                                                                                                                                                                                                             |                                      |                |      |                  |      |            |      |            |      |                   |      |           |      |                                |      |              |      |                        |      |                            |      |                             |      |                  |      |                     |      |               |      |             |      |                     |     |                          |      |                |      |                                |      |                                      |      |                          |      |                 |      |                  |      |                        |      |                    |      |              |      |                                      |      |                      |      |                 |      |                                      |    |                  |      |                  |     |            |      |         |      |                     |      |                  |      |                   |  |  |
| Prescriber                                                                                                                                                                                                                                                                                                                                                                                                                                                                                                                                                                                                                                                                                                                | AH                                   | <table border="0"> <tr> <td>ANES</td> <td>Anesthesiology</td> <td>MDON</td> <td>Medical Oncology</td> </tr> <tr> <td>CARD</td> <td>Cardiology</td> <td>NEPH</td> <td>Nephrology</td> </tr> <tr> <td>CLIM</td> <td>Internal Medicine</td> <td>NEUR</td> <td>Neurology</td> </tr> <tr> <td>CMSP</td> <td>Community Medicine - Specialty</td> <td>NUSG</td> <td>Neurosurgery</td> </tr> <tr> <td>CRCM</td> <td>Critical Care Medicine</td> <td>OBGY</td> <td>Obstetrics and Gynaecology</td> </tr> <tr> <td>CRSG</td> <td>Cardio and Thoracic Surgery</td> <td>OCMD</td> <td>General Practice</td> </tr> <tr> <td>CTSG</td> <td>Cardio and Thoracic</td> <td>OPHT</td> <td>Ophthalmology</td> </tr> <tr> <td>DERM</td> <td>Dermatology</td> <td>ORTH</td> <td>Orthopaedic Surgery</td> </tr> <tr> <td>E/M</td> <td>Endocrinology/Metabolism</td> <td>OTOL</td> <td>Otolaryngology</td> </tr> <tr> <td>EMSP</td> <td>Emergency Medicine - Specialty</td> <td>PHMD</td> <td>Physical Medicine and Rehabilitation</td> </tr> <tr> <td>FTER</td> <td>Full Time Emergency Room</td> <td>PLAS</td> <td>Plastic Surgery</td> </tr> <tr> <td>GAST</td> <td>Gastroenterology</td> <td>PSYC</td> <td>Psychiatry - Specialty</td> </tr> <tr> <td>GEMD</td> <td>Geriatric Medicine</td> <td>RHEU</td> <td>Rheumatology</td> </tr> <tr> <td>GNMH</td> <td>Generalists Mental Health Physicians</td> <td>RSMD</td> <td>Respiratory Medicine</td> </tr> <tr> <td>GNSG</td> <td>General Surgery</td> <td>SPMH</td> <td>Specialists Mental Health Physicians</td> </tr> <tr> <td>GP</td> <td>General Practice</td> <td>THOR</td> <td>Thoracic Surgery</td> </tr> <tr> <td>HEM</td> <td>Hematology</td> <td>UROL</td> <td>Urology</td> </tr> <tr> <td>IDIS</td> <td>Infectious Diseases</td> <td>VSSG</td> <td>Vascular Surgery</td> </tr> <tr> <td>INMD</td> <td>Internal Medicine</td> <td></td> <td></td> </tr> </table> | ANES                                 | Anesthesiology | MDON | Medical Oncology | CARD | Cardiology | NEPH | Nephrology | CLIM | Internal Medicine | NEUR | Neurology | CMSP | Community Medicine - Specialty | NUSG | Neurosurgery | CRCM | Critical Care Medicine | OBGY | Obstetrics and Gynaecology | CRSG | Cardio and Thoracic Surgery | OCMD | General Practice | CTSG | Cardio and Thoracic | OPHT | Ophthalmology | DERM | Dermatology | ORTH | Orthopaedic Surgery | E/M | Endocrinology/Metabolism | OTOL | Otolaryngology | EMSP | Emergency Medicine - Specialty | PHMD | Physical Medicine and Rehabilitation | FTER | Full Time Emergency Room | PLAS | Plastic Surgery | GAST | Gastroenterology | PSYC | Psychiatry - Specialty | GEMD | Geriatric Medicine | RHEU | Rheumatology | GNMH | Generalists Mental Health Physicians | RSMD | Respiratory Medicine | GNSG | General Surgery | SPMH | Specialists Mental Health Physicians | GP | General Practice | THOR | Thoracic Surgery | HEM | Hematology | UROL | Urology | IDIS | Infectious Diseases | VSSG | Vascular Surgery | INMD | Internal Medicine |  |  |
| ANES                                                                                                                                                                                                                                                                                                                                                                                                                                                                                                                                                                                                                                                                                                                      | Anesthesiology                       | MDON                                                                                                                                                                                                                                                                                                                                                                                                                                                                                                                                                                                                                                                                                                                                                                                                                                                                                                                                                                                                                                                                                                                                                                                                                                                                                                                                                                                                                                                                                                                                                                                                                                                                                                                                                                                                                                                                                                   | Medical Oncology                     |                |      |                  |      |            |      |            |      |                   |      |           |      |                                |      |              |      |                        |      |                            |      |                             |      |                  |      |                     |      |               |      |             |      |                     |     |                          |      |                |      |                                |      |                                      |      |                          |      |                 |      |                  |      |                        |      |                    |      |              |      |                                      |      |                      |      |                 |      |                                      |    |                  |      |                  |     |            |      |         |      |                     |      |                  |      |                   |  |  |
| CARD                                                                                                                                                                                                                                                                                                                                                                                                                                                                                                                                                                                                                                                                                                                      | Cardiology                           | NEPH                                                                                                                                                                                                                                                                                                                                                                                                                                                                                                                                                                                                                                                                                                                                                                                                                                                                                                                                                                                                                                                                                                                                                                                                                                                                                                                                                                                                                                                                                                                                                                                                                                                                                                                                                                                                                                                                                                   | Nephrology                           |                |      |                  |      |            |      |            |      |                   |      |           |      |                                |      |              |      |                        |      |                            |      |                             |      |                  |      |                     |      |               |      |             |      |                     |     |                          |      |                |      |                                |      |                                      |      |                          |      |                 |      |                  |      |                        |      |                    |      |              |      |                                      |      |                      |      |                 |      |                                      |    |                  |      |                  |     |            |      |         |      |                     |      |                  |      |                   |  |  |
| CLIM                                                                                                                                                                                                                                                                                                                                                                                                                                                                                                                                                                                                                                                                                                                      | Internal Medicine                    | NEUR                                                                                                                                                                                                                                                                                                                                                                                                                                                                                                                                                                                                                                                                                                                                                                                                                                                                                                                                                                                                                                                                                                                                                                                                                                                                                                                                                                                                                                                                                                                                                                                                                                                                                                                                                                                                                                                                                                   | Neurology                            |                |      |                  |      |            |      |            |      |                   |      |           |      |                                |      |              |      |                        |      |                            |      |                             |      |                  |      |                     |      |               |      |             |      |                     |     |                          |      |                |      |                                |      |                                      |      |                          |      |                 |      |                  |      |                        |      |                    |      |              |      |                                      |      |                      |      |                 |      |                                      |    |                  |      |                  |     |            |      |         |      |                     |      |                  |      |                   |  |  |
| CMSP                                                                                                                                                                                                                                                                                                                                                                                                                                                                                                                                                                                                                                                                                                                      | Community Medicine - Specialty       | NUSG                                                                                                                                                                                                                                                                                                                                                                                                                                                                                                                                                                                                                                                                                                                                                                                                                                                                                                                                                                                                                                                                                                                                                                                                                                                                                                                                                                                                                                                                                                                                                                                                                                                                                                                                                                                                                                                                                                   | Neurosurgery                         |                |      |                  |      |            |      |            |      |                   |      |           |      |                                |      |              |      |                        |      |                            |      |                             |      |                  |      |                     |      |               |      |             |      |                     |     |                          |      |                |      |                                |      |                                      |      |                          |      |                 |      |                  |      |                        |      |                    |      |              |      |                                      |      |                      |      |                 |      |                                      |    |                  |      |                  |     |            |      |         |      |                     |      |                  |      |                   |  |  |
| CRCM                                                                                                                                                                                                                                                                                                                                                                                                                                                                                                                                                                                                                                                                                                                      | Critical Care Medicine               | OBGY                                                                                                                                                                                                                                                                                                                                                                                                                                                                                                                                                                                                                                                                                                                                                                                                                                                                                                                                                                                                                                                                                                                                                                                                                                                                                                                                                                                                                                                                                                                                                                                                                                                                                                                                                                                                                                                                                                   | Obstetrics and Gynaecology           |                |      |                  |      |            |      |            |      |                   |      |           |      |                                |      |              |      |                        |      |                            |      |                             |      |                  |      |                     |      |               |      |             |      |                     |     |                          |      |                |      |                                |      |                                      |      |                          |      |                 |      |                  |      |                        |      |                    |      |              |      |                                      |      |                      |      |                 |      |                                      |    |                  |      |                  |     |            |      |         |      |                     |      |                  |      |                   |  |  |
| CRSG                                                                                                                                                                                                                                                                                                                                                                                                                                                                                                                                                                                                                                                                                                                      | Cardio and Thoracic Surgery          | OCMD                                                                                                                                                                                                                                                                                                                                                                                                                                                                                                                                                                                                                                                                                                                                                                                                                                                                                                                                                                                                                                                                                                                                                                                                                                                                                                                                                                                                                                                                                                                                                                                                                                                                                                                                                                                                                                                                                                   | General Practice                     |                |      |                  |      |            |      |            |      |                   |      |           |      |                                |      |              |      |                        |      |                            |      |                             |      |                  |      |                     |      |               |      |             |      |                     |     |                          |      |                |      |                                |      |                                      |      |                          |      |                 |      |                  |      |                        |      |                    |      |              |      |                                      |      |                      |      |                 |      |                                      |    |                  |      |                  |     |            |      |         |      |                     |      |                  |      |                   |  |  |
| CTSG                                                                                                                                                                                                                                                                                                                                                                                                                                                                                                                                                                                                                                                                                                                      | Cardio and Thoracic                  | OPHT                                                                                                                                                                                                                                                                                                                                                                                                                                                                                                                                                                                                                                                                                                                                                                                                                                                                                                                                                                                                                                                                                                                                                                                                                                                                                                                                                                                                                                                                                                                                                                                                                                                                                                                                                                                                                                                                                                   | Ophthalmology                        |                |      |                  |      |            |      |            |      |                   |      |           |      |                                |      |              |      |                        |      |                            |      |                             |      |                  |      |                     |      |               |      |             |      |                     |     |                          |      |                |      |                                |      |                                      |      |                          |      |                 |      |                  |      |                        |      |                    |      |              |      |                                      |      |                      |      |                 |      |                                      |    |                  |      |                  |     |            |      |         |      |                     |      |                  |      |                   |  |  |
| DERM                                                                                                                                                                                                                                                                                                                                                                                                                                                                                                                                                                                                                                                                                                                      | Dermatology                          | ORTH                                                                                                                                                                                                                                                                                                                                                                                                                                                                                                                                                                                                                                                                                                                                                                                                                                                                                                                                                                                                                                                                                                                                                                                                                                                                                                                                                                                                                                                                                                                                                                                                                                                                                                                                                                                                                                                                                                   | Orthopaedic Surgery                  |                |      |                  |      |            |      |            |      |                   |      |           |      |                                |      |              |      |                        |      |                            |      |                             |      |                  |      |                     |      |               |      |             |      |                     |     |                          |      |                |      |                                |      |                                      |      |                          |      |                 |      |                  |      |                        |      |                    |      |              |      |                                      |      |                      |      |                 |      |                                      |    |                  |      |                  |     |            |      |         |      |                     |      |                  |      |                   |  |  |
| E/M                                                                                                                                                                                                                                                                                                                                                                                                                                                                                                                                                                                                                                                                                                                       | Endocrinology/Metabolism             | OTOL                                                                                                                                                                                                                                                                                                                                                                                                                                                                                                                                                                                                                                                                                                                                                                                                                                                                                                                                                                                                                                                                                                                                                                                                                                                                                                                                                                                                                                                                                                                                                                                                                                                                                                                                                                                                                                                                                                   | Otolaryngology                       |                |      |                  |      |            |      |            |      |                   |      |           |      |                                |      |              |      |                        |      |                            |      |                             |      |                  |      |                     |      |               |      |             |      |                     |     |                          |      |                |      |                                |      |                                      |      |                          |      |                 |      |                  |      |                        |      |                    |      |              |      |                                      |      |                      |      |                 |      |                                      |    |                  |      |                  |     |            |      |         |      |                     |      |                  |      |                   |  |  |
| EMSP                                                                                                                                                                                                                                                                                                                                                                                                                                                                                                                                                                                                                                                                                                                      | Emergency Medicine - Specialty       | PHMD                                                                                                                                                                                                                                                                                                                                                                                                                                                                                                                                                                                                                                                                                                                                                                                                                                                                                                                                                                                                                                                                                                                                                                                                                                                                                                                                                                                                                                                                                                                                                                                                                                                                                                                                                                                                                                                                                                   | Physical Medicine and Rehabilitation |                |      |                  |      |            |      |            |      |                   |      |           |      |                                |      |              |      |                        |      |                            |      |                             |      |                  |      |                     |      |               |      |             |      |                     |     |                          |      |                |      |                                |      |                                      |      |                          |      |                 |      |                  |      |                        |      |                    |      |              |      |                                      |      |                      |      |                 |      |                                      |    |                  |      |                  |     |            |      |         |      |                     |      |                  |      |                   |  |  |
| FTER                                                                                                                                                                                                                                                                                                                                                                                                                                                                                                                                                                                                                                                                                                                      | Full Time Emergency Room             | PLAS                                                                                                                                                                                                                                                                                                                                                                                                                                                                                                                                                                                                                                                                                                                                                                                                                                                                                                                                                                                                                                                                                                                                                                                                                                                                                                                                                                                                                                                                                                                                                                                                                                                                                                                                                                                                                                                                                                   | Plastic Surgery                      |                |      |                  |      |            |      |            |      |                   |      |           |      |                                |      |              |      |                        |      |                            |      |                             |      |                  |      |                     |      |               |      |             |      |                     |     |                          |      |                |      |                                |      |                                      |      |                          |      |                 |      |                  |      |                        |      |                    |      |              |      |                                      |      |                      |      |                 |      |                                      |    |                  |      |                  |     |            |      |         |      |                     |      |                  |      |                   |  |  |
| GAST                                                                                                                                                                                                                                                                                                                                                                                                                                                                                                                                                                                                                                                                                                                      | Gastroenterology                     | PSYC                                                                                                                                                                                                                                                                                                                                                                                                                                                                                                                                                                                                                                                                                                                                                                                                                                                                                                                                                                                                                                                                                                                                                                                                                                                                                                                                                                                                                                                                                                                                                                                                                                                                                                                                                                                                                                                                                                   | Psychiatry - Specialty               |                |      |                  |      |            |      |            |      |                   |      |           |      |                                |      |              |      |                        |      |                            |      |                             |      |                  |      |                     |      |               |      |             |      |                     |     |                          |      |                |      |                                |      |                                      |      |                          |      |                 |      |                  |      |                        |      |                    |      |              |      |                                      |      |                      |      |                 |      |                                      |    |                  |      |                  |     |            |      |         |      |                     |      |                  |      |                   |  |  |
| GEMD                                                                                                                                                                                                                                                                                                                                                                                                                                                                                                                                                                                                                                                                                                                      | Geriatric Medicine                   | RHEU                                                                                                                                                                                                                                                                                                                                                                                                                                                                                                                                                                                                                                                                                                                                                                                                                                                                                                                                                                                                                                                                                                                                                                                                                                                                                                                                                                                                                                                                                                                                                                                                                                                                                                                                                                                                                                                                                                   | Rheumatology                         |                |      |                  |      |            |      |            |      |                   |      |           |      |                                |      |              |      |                        |      |                            |      |                             |      |                  |      |                     |      |               |      |             |      |                     |     |                          |      |                |      |                                |      |                                      |      |                          |      |                 |      |                  |      |                        |      |                    |      |              |      |                                      |      |                      |      |                 |      |                                      |    |                  |      |                  |     |            |      |         |      |                     |      |                  |      |                   |  |  |
| GNMH                                                                                                                                                                                                                                                                                                                                                                                                                                                                                                                                                                                                                                                                                                                      | Generalists Mental Health Physicians | RSMD                                                                                                                                                                                                                                                                                                                                                                                                                                                                                                                                                                                                                                                                                                                                                                                                                                                                                                                                                                                                                                                                                                                                                                                                                                                                                                                                                                                                                                                                                                                                                                                                                                                                                                                                                                                                                                                                                                   | Respiratory Medicine                 |                |      |                  |      |            |      |            |      |                   |      |           |      |                                |      |              |      |                        |      |                            |      |                             |      |                  |      |                     |      |               |      |             |      |                     |     |                          |      |                |      |                                |      |                                      |      |                          |      |                 |      |                  |      |                        |      |                    |      |              |      |                                      |      |                      |      |                 |      |                                      |    |                  |      |                  |     |            |      |         |      |                     |      |                  |      |                   |  |  |
| GNSG                                                                                                                                                                                                                                                                                                                                                                                                                                                                                                                                                                                                                                                                                                                      | General Surgery                      | SPMH                                                                                                                                                                                                                                                                                                                                                                                                                                                                                                                                                                                                                                                                                                                                                                                                                                                                                                                                                                                                                                                                                                                                                                                                                                                                                                                                                                                                                                                                                                                                                                                                                                                                                                                                                                                                                                                                                                   | Specialists Mental Health Physicians |                |      |                  |      |            |      |            |      |                   |      |           |      |                                |      |              |      |                        |      |                            |      |                             |      |                  |      |                     |      |               |      |             |      |                     |     |                          |      |                |      |                                |      |                                      |      |                          |      |                 |      |                  |      |                        |      |                    |      |              |      |                                      |      |                      |      |                 |      |                                      |    |                  |      |                  |     |            |      |         |      |                     |      |                  |      |                   |  |  |
| GP                                                                                                                                                                                                                                                                                                                                                                                                                                                                                                                                                                                                                                                                                                                        | General Practice                     | THOR                                                                                                                                                                                                                                                                                                                                                                                                                                                                                                                                                                                                                                                                                                                                                                                                                                                                                                                                                                                                                                                                                                                                                                                                                                                                                                                                                                                                                                                                                                                                                                                                                                                                                                                                                                                                                                                                                                   | Thoracic Surgery                     |                |      |                  |      |            |      |            |      |                   |      |           |      |                                |      |              |      |                        |      |                            |      |                             |      |                  |      |                     |      |               |      |             |      |                     |     |                          |      |                |      |                                |      |                                      |      |                          |      |                 |      |                  |      |                        |      |                    |      |              |      |                                      |      |                      |      |                 |      |                                      |    |                  |      |                  |     |            |      |         |      |                     |      |                  |      |                   |  |  |
| HEM                                                                                                                                                                                                                                                                                                                                                                                                                                                                                                                                                                                                                                                                                                                       | Hematology                           | UROL                                                                                                                                                                                                                                                                                                                                                                                                                                                                                                                                                                                                                                                                                                                                                                                                                                                                                                                                                                                                                                                                                                                                                                                                                                                                                                                                                                                                                                                                                                                                                                                                                                                                                                                                                                                                                                                                                                   | Urology                              |                |      |                  |      |            |      |            |      |                   |      |           |      |                                |      |              |      |                        |      |                            |      |                             |      |                  |      |                     |      |               |      |             |      |                     |     |                          |      |                |      |                                |      |                                      |      |                          |      |                 |      |                  |      |                        |      |                    |      |              |      |                                      |      |                      |      |                 |      |                                      |    |                  |      |                  |     |            |      |         |      |                     |      |                  |      |                   |  |  |
| IDIS                                                                                                                                                                                                                                                                                                                                                                                                                                                                                                                                                                                                                                                                                                                      | Infectious Diseases                  | VSSG                                                                                                                                                                                                                                                                                                                                                                                                                                                                                                                                                                                                                                                                                                                                                                                                                                                                                                                                                                                                                                                                                                                                                                                                                                                                                                                                                                                                                                                                                                                                                                                                                                                                                                                                                                                                                                                                                                   | Vascular Surgery                     |                |      |                  |      |            |      |            |      |                   |      |           |      |                                |      |              |      |                        |      |                            |      |                             |      |                  |      |                     |      |               |      |             |      |                     |     |                          |      |                |      |                                |      |                                      |      |                          |      |                 |      |                  |      |                        |      |                    |      |              |      |                                      |      |                      |      |                 |      |                                      |    |                  |      |                  |     |            |      |         |      |                     |      |                  |      |                   |  |  |
| INMD                                                                                                                                                                                                                                                                                                                                                                                                                                                                                                                                                                                                                                                                                                                      | Internal Medicine                    |                                                                                                                                                                                                                                                                                                                                                                                                                                                                                                                                                                                                                                                                                                                                                                                                                                                                                                                                                                                                                                                                                                                                                                                                                                                                                                                                                                                                                                                                                                                                                                                                                                                                                                                                                                                                                                                                                                        |                                      |                |      |                  |      |            |      |            |      |                   |      |           |      |                                |      |              |      |                        |      |                            |      |                             |      |                  |      |                     |      |               |      |             |      |                     |     |                          |      |                |      |                                |      |                                      |      |                          |      |                 |      |                  |      |                        |      |                    |      |              |      |                                      |      |                      |      |                 |      |                                      |    |                  |      |                  |     |            |      |         |      |                     |      |                  |      |                   |  |  |
| <b>Outcomes</b>                                                                                                                                                                                                                                                                                                                                                                                                                                                                                                                                                                                                                                                                                                           | <b>Database</b>                      | <b>Codes</b>                                                                                                                                                                                                                                                                                                                                                                                                                                                                                                                                                                                                                                                                                                                                                                                                                                                                                                                                                                                                                                                                                                                                                                                                                                                                                                                                                                                                                                                                                                                                                                                                                                                                                                                                                                                                                                                                                           |                                      |                |      |                  |      |            |      |            |      |                   |      |           |      |                                |      |              |      |                        |      |                            |      |                             |      |                  |      |                     |      |               |      |             |      |                     |     |                          |      |                |      |                                |      |                                      |      |                          |      |                 |      |                  |      |                        |      |                    |      |              |      |                                      |      |                      |      |                 |      |                                      |    |                  |      |                  |     |            |      |         |      |                     |      |                  |      |                   |  |  |
| Laboratory investigation                                                                                                                                                                                                                                                                                                                                                                                                                                                                                                                                                                                                                                                                                                  | AKDN                                 |                                                                                                                                                                                                                                                                                                                                                                                                                                                                                                                                                                                                                                                                                                                                                                                                                                                                                                                                                                                                                                                                                                                                                                                                                                                                                                                                                                                                                                                                                                                                                                                                                                                                                                                                                                                                                                                                                                        |                                      |                |      |                  |      |            |      |            |      |                   |      |           |      |                                |      |              |      |                        |      |                            |      |                             |      |                  |      |                     |      |               |      |             |      |                     |     |                          |      |                |      |                                |      |                                      |      |                          |      |                 |      |                  |      |                        |      |                    |      |              |      |                                      |      |                      |      |                 |      |                                      |    |                  |      |                  |     |            |      |         |      |                     |      |                  |      |                   |  |  |
| Mortality                                                                                                                                                                                                                                                                                                                                                                                                                                                                                                                                                                                                                                                                                                                 | AH                                   | Alberta Vital Statistics                                                                                                                                                                                                                                                                                                                                                                                                                                                                                                                                                                                                                                                                                                                                                                                                                                                                                                                                                                                                                                                                                                                                                                                                                                                                                                                                                                                                                                                                                                                                                                                                                                                                                                                                                                                                                                                                               |                                      |                |      |                  |      |            |      |            |      |                   |      |           |      |                                |      |              |      |                        |      |                            |      |                             |      |                  |      |                     |      |               |      |             |      |                     |     |                          |      |                |      |                                |      |                                      |      |                          |      |                 |      |                  |      |                        |      |                    |      |              |      |                                      |      |                      |      |                 |      |                                      |    |                  |      |                  |     |            |      |         |      |                     |      |                  |      |                   |  |  |
| All-cause hospitalization                                                                                                                                                                                                                                                                                                                                                                                                                                                                                                                                                                                                                                                                                                 | AH                                   |                                                                                                                                                                                                                                                                                                                                                                                                                                                                                                                                                                                                                                                                                                                                                                                                                                                                                                                                                                                                                                                                                                                                                                                                                                                                                                                                                                                                                                                                                                                                                                                                                                                                                                                                                                                                                                                                                                        |                                      |                |      |                  |      |            |      |            |      |                   |      |           |      |                                |      |              |      |                        |      |                            |      |                             |      |                  |      |                     |      |               |      |             |      |                     |     |                          |      |                |      |                                |      |                                      |      |                          |      |                 |      |                  |      |                        |      |                    |      |              |      |                                      |      |                      |      |                 |      |                                      |    |                  |      |                  |     |            |      |         |      |                     |      |                  |      |                   |  |  |
| <p>Abbreviations: ACCS, Ambulatory Care Classification System; AH, Alberta Health; AKDN, Alberta Kidney Disease Network; CCI, Canadian Classification of Health Interventions; CCP, Canadian Classification of Diagnostic, Therapeutic, and Surgical Procedures; CNI, Calcineurin inhibitor; ICD-9-CM, International Classification of Diseases, Ninth Revision, Clinical Modification; ICD-10, International Statistical Classification of Diseases, Tenth Revision; NARP, Northern Alberta Renal Program; NSAIDs, Nonsteroidal anti-inflammatory drugs; PIN, Pharmaceutical Information Network; PPV, positive predictive value; SARP, Southern Alberta Renal Program; SES, socio-economic status; Sn, sensitivity.</p> |                                      |                                                                                                                                                                                                                                                                                                                                                                                                                                                                                                                                                                                                                                                                                                                                                                                                                                                                                                                                                                                                                                                                                                                                                                                                                                                                                                                                                                                                                                                                                                                                                                                                                                                                                                                                                                                                                                                                                                        |                                      |                |      |                  |      |            |      |            |      |                   |      |           |      |                                |      |              |      |                        |      |                            |      |                             |      |                  |      |                     |      |               |      |             |      |                     |     |                          |      |                |      |                                |      |                                      |      |                          |      |                 |      |                  |      |                        |      |                    |      |              |      |                                      |      |                      |      |                 |      |                                      |    |                  |      |                  |     |            |      |         |      |                     |      |                  |      |                   |  |  |
